# Supplementary material
Source: Royal Society of Chemistry journal article supplement (doi:10.1039/d4cs01126k)
Supplement: d4cs01126k1.pdf [file d4cs01126k1.pdf]

## Supporting Information

for the paper

### Designing stable $\pi$ -radicals

Arthur Houplin,<sup>a,†</sup> Cheng-Hao Liu,<sup>a,b,†</sup> and Dmytro F. Perepichka<sup>a,\*</sup>

<sup>a</sup> Department of Chemistry, McGill University, Montreal, Qc, Canada

<sup>b</sup> Division of Chemistry and Chemical Engineering, California Institute of Technology, Pasadena, CA, USA

<sup>†</sup> These authors contributed equally

**Table 1** : Reported halogenated trityl radicals.

| Entry | Structure                                                                           | Reference                                                                     |
|-------|-------------------------------------------------------------------------------------|-------------------------------------------------------------------------------|
| 1     | 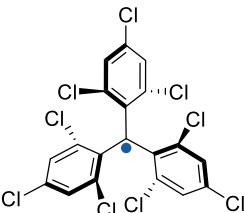   | M. Ballester,<br><i>Acc. Chem. Res.</i> , 1985, <b>18</b> , 380–387.          |
| 2     |   | K. Lv, et al.,<br><i>Chem. Commun.</i> , 2024, <b>60</b> , 4846–4849.         |
| 3     |  | K. Lv, et al.,<br><i>Chem. Commun.</i> , 2024, <b>60</b> , 4846–4849.         |
| 4     |  | N. Sun, et al.,<br><i>Org. Lett.</i> , 2025, <b>27</b> , 905–908.             |
| 5     |  | Z. Li, et al.,<br><i>Angew. Chem. Int. Ed.</i> , 2023, <b>62</b> , e202302835 |

|    |                                                                                     |                                                                                      |
|----|-------------------------------------------------------------------------------------|--------------------------------------------------------------------------------------|
| 6  | 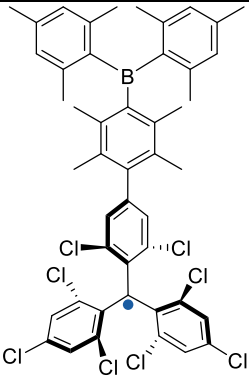   | <p>Z. Li, et al.,<br/> <i>Angew. Chem. Int. Ed.</i>, 2023, <b>62</b>, e202302835</p> |
| 7  |    | <p>V. Gamero, et al.,<br/> <i>Tetrahedron Lett.</i>, 2006, <b>47</b>, 2305–2309.</p> |
| 8  |   | <p>D. Velasco, et al.,<br/> <i>J. Org. Chem.</i>, 2007, <b>72</b>, 7523–7532.</p>    |
| 9  |  | <p>D. Velasco, et al.,<br/> <i>J. Org. Chem.</i>, 2007, <b>72</b>, 7523–7532.</p>    |
| 10 |  | <p>D. Velasco, et al.,<br/> <i>J. Org. Chem.</i>, 2007, <b>72</b>, 7523–7532.</p>    |

|    |                                                                                     |                                                                                                                                                |
|----|-------------------------------------------------------------------------------------|------------------------------------------------------------------------------------------------------------------------------------------------|
| 11 | 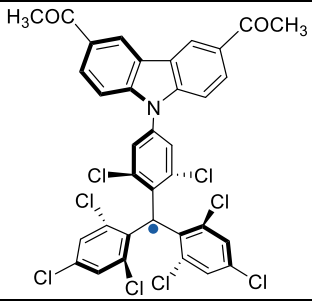   | <p>D. Velasco, et al.,<br/> <i>J. Org. Chem.</i>, 2007, <b>72</b>, 7523–7532.</p>                                                              |
| 12 |    | <p>X. Ai, et al.,<br/> <i>Nature</i>, 2018, <b>563</b>, 536–540.</p>                                                                           |
| 13 |   | <p>X. Ai, et al.,<br/> <i>Nature</i>, 2018, <b>563</b>, 536–540.</p> <p>H. Guo, et al.,<br/> <i>Nat. Mater.</i>, 2019, <b>18</b>, 977–984.</p> |
| 14 |  | <p>Z. Tong, et al.,<br/> <i>J. Am. Chem. Soc.</i>, 2025, <b>147</b>, 39232–39246.</p>                                                          |
| 15 |  | <p>H.-H. Cho, et al.,<br/> <i>Nat. Photon.</i>, 2024, <b>18</b>, 905–912.</p>                                                                  |

|    |                                                                                     |                                                                                          |
|----|-------------------------------------------------------------------------------------|------------------------------------------------------------------------------------------|
| 16 | 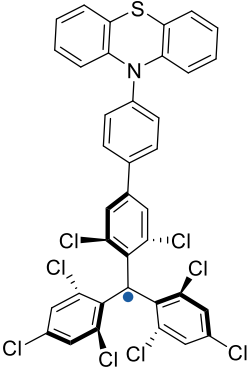   | <p>H. Guo, et al.,<br/><i>Nat. Mater.</i>, 2019, <b>18</b>, 977–984.</p>                 |
| 17 |    | <p>O. Armet, et al.,<br/><i>J. Phys. Chem.</i>, 1987, <b>91</b>, 5608–5616.</p>          |
| 18 |    | <p>D. MasPOCH et al.,<br/><i>Nature Mater</i>, 2003, <b>2</b>, 190–195.</p>              |
| 19 |  | <p>V. Dang, et al.,<br/><i>Bioorg. Med. Chem. Lett.</i>, 2007, <b>17</b>, 4062–4065.</p> |
| 20 |  | <p>C.-H. Liu et al.,<br/><i>Cell Rep. Phys. Sci.</i>, 2022, <b>3</b>, 100858.</p>        |
| 21 |  | <p>S. Wu, et al.,<br/><i>Angew. Chem. Int. Ed.</i>, 2018, <b>57</b>, 8007–8011.</p>      |

|    |                                                                                     |                                                                                         |
|----|-------------------------------------------------------------------------------------|-----------------------------------------------------------------------------------------|
| 22 | 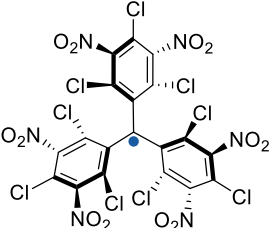   | <p>J. L. Torres, et al.,<br/><i>Chem. Commun.</i>, 2003, 74–75.</p>                     |
| 23 |    | <p>N. Roques, et al.,<br/><i>Chem. Eur. J.</i>, 2006, <b>12</b>, 9238–9253</p>          |
| 24 |    | <p>J. Schlögl, et al.,<br/><i>J. Am. Chem. Soc.</i>, 2025, <b>147</b>, 43105–43112.</p> |
| 25 |   | <p>A. Heckmann, et al.,<br/><i>J. Phys. Chem. C</i>, 2009, <b>113</b>, 20958–20966.</p> |
| 26 |  | <p>A. Heckmann, et al.,<br/><i>J. Phys. Chem. C</i>, 2009, <b>113</b>, 20958–20966.</p> |

|    |                                                                                     |                                                                                          |
|----|-------------------------------------------------------------------------------------|------------------------------------------------------------------------------------------|
| 27 | 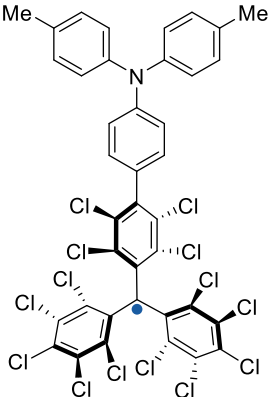   | <p>A. Heckmann, et al.,<br/> <i>J. Phys. Chem. C</i>, 2009, <b>113</b>, 20958–20966.</p> |
| 28 |    | <p>A. Heckmann, et al.,<br/> <i>J. Phys. Chem. C</i>, 2009, <b>113</b>, 20958–20966.</p> |
| 29 |   | <p>A. Heckmann, et al.,<br/> <i>J. Phys. Chem. C</i>, 2009, <b>113</b>, 20958–20966.</p> |
| 30 |  | <p>A. Heckmann, et al.,<br/> <i>J. Phys. Chem. C</i>, 2009, <b>113</b>, 20958–20966.</p> |

|    |                                                                                     |                                                                                          |
|----|-------------------------------------------------------------------------------------|------------------------------------------------------------------------------------------|
| 31 | 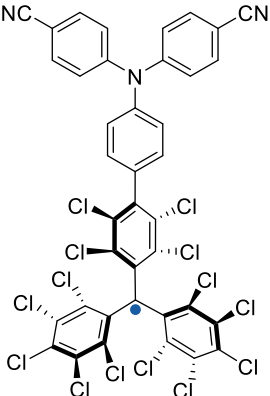   | <p>A. Heckmann, et al.,<br/> <i>J. Phys. Chem. C</i>, 2009, <b>113</b>, 20958–20966.</p> |
| 32 |    | <p>A. Heckmann, et al.,<br/> <i>J. Phys. Chem. C</i>, 2009, <b>113</b>, 20958–20966.</p> |
| 33 |   | <p>H. Guo, et al.,<br/> <i>Nat. Mater.</i>, 2019, <b>18</b>, 977–984.</p>                |
| 34 |  | <p>H. Guo, et al.,<br/> <i>Nat. Mater.</i>, 2019, <b>18</b>, 977–984.</p>                |

|    |                                                                                     |                                                                                   |
|----|-------------------------------------------------------------------------------------|-----------------------------------------------------------------------------------|
| 35 | 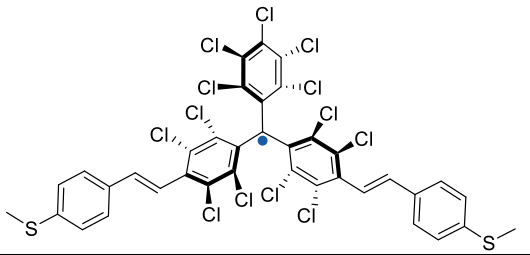   | G. Mitra, et al.,<br><i>Nano Lett.</i> , 2022, <b>22</b> , 5773–5779.             |
| 36 |    | P. Mayorga-Burrezo et al.,<br><i>Chem. Eur. J.</i> , 2020, <b>26</b> , 3776–3781. |
| 37 |    | P. Mayorga-Burrezo et al.,<br><i>Chem. Eur. J.</i> , 2020, <b>26</b> , 3776–3781. |
| 38 |   | J. Schlögl, et al.,<br><i>J. Am. Chem. Soc.</i> , 2025, <b>147</b> , 43105–43112. |
| 39 |  | J. Schlögl, et al.,<br><i>J. Am. Chem. Soc.</i> , 2025, <b>147</b> , 43105–43112. |

**Table 2** : Reported alkoxyated and sulfonlated trityl radicals.

| Entry | Structure                                                                           | Reference                                                                      |
|-------|-------------------------------------------------------------------------------------|--------------------------------------------------------------------------------|
| 40    | 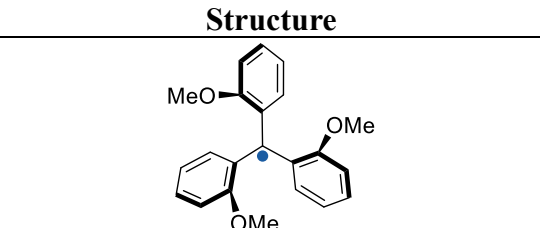 | H. Lund,<br><i>J. Am. Chem. Soc.</i> , 1927, <b>49</b> , 1346–1360.            |
| 41    |  | M. Sabacky, et al.,<br><i>J. Am. Chem. Soc.</i> , 1967, <b>89</b> , 2054–2058. |

|    |                                                                                     |                                                                                              |
|----|-------------------------------------------------------------------------------------|----------------------------------------------------------------------------------------------|
| 42 | 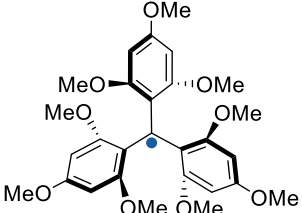   | <p>H. E. Hackney, et al.,<br/><i>Angew. Chem. Int. Ed.</i>, 2025, <b>64</b>, e202512411.</p> |
| 43 |    | <p>H. E. Hackney, et al.,<br/><i>Angew. Chem. Int. Ed.</i>, 2025, <b>64</b>, e202512411.</p> |
| 44 |    | <p>H. E. Hackney, et al.,<br/><i>Angew. Chem. Int. Ed.</i>, 2025, <b>64</b>, e202512411.</p> |
| 45 |   | <p>H. E. Hackney, et al.,<br/><i>Angew. Chem. Int. Ed.</i>, 2025, <b>64</b>, e202512411.</p> |
| 46 |  | <p>H. E. Hackney, et al.,<br/><i>Angew. Chem. Int. Ed.</i>, 2025, <b>64</b>, e202512411.</p> |
| 47 |  | <p>T. J. Reddy, et al.,<br/><i>J. Org. Chem.</i>, 2002, <b>67</b>, 4635–4639.</p>            |
| 48 |  | <p>A. A. Bobko, et al.,<br/><i>J. Am. Chem. Soc.</i>, 2007, <b>129</b>, 7240–7241.</p>       |

|    |                                                                                   |                                                                                           |
|----|-----------------------------------------------------------------------------------|-------------------------------------------------------------------------------------------|
| 49 | 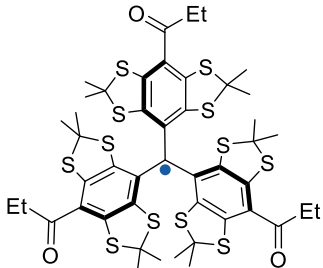 | <p>T. J. Reddy, et al.,<br/><i>J. Org. Chem.</i>, 2002, <b>67</b>, 4635–4639.</p>         |
| 50 |  | <p>G. Y. Shevelev, et al.,<br/><i>J. Am. Chem. Soc.</i>, 2014, <b>136</b>, 9874–9877.</p> |

**Table 3** : Reported tri(hetero)arylmethyl radicals.

| Entry | Structure: Heteroatom                                                               | Reference                                                                                           |
|-------|-------------------------------------------------------------------------------------|-----------------------------------------------------------------------------------------------------|
| 51    | 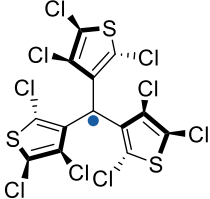  | <p>S. Gronowitz, et al.,<br/><i>J. Heterocycl. Chem.</i>, 1995, <b>32</b>, 65–67.</p>               |
| 52    |  | <p>S. Gronowitz, et al.,<br/><i>J. Heterocycl. Chem.</i>, 1995, <b>32</b>, 65–67.</p>               |
| 53    |  | <p>T. Y. Gopalakrishna, et al.,<br/><i>Angew. Chem. Int. Ed.</i>, 2014, <b>53</b>, 10984–10987.</p> |
| 54    |  | <p>S. Kimura, et al.,<br/><i>Angew. Chem. Int. Ed.</i>, 2018, <b>130</b>, 12893–12897.</p>          |

|    |                                                                                     |                                                                                      |
|----|-------------------------------------------------------------------------------------|--------------------------------------------------------------------------------------|
| 55 | 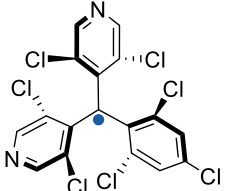   | <p>S. Kimura, et al.,<br/><i>J. Am. Chem. Soc.</i>, 2021, <b>143</b>, 5610–5615.</p> |
| 56 |    | <p>S. Kimura, et al.,<br/><i>J. Am. Chem. Soc.</i>, 2021, <b>143</b>, 4329–4338.</p> |
| 57 |    | <p>Y. Hattori, et al.,<br/><i>Chem. Eur. J.</i>, 2019, <b>25</b>, 15463–15471.</p>   |
| 58 |   | <p>Y. Hattori, et al.,<br/><i>Chem. Eur. J.</i>, 2019, <b>25</b>, 15463–15471.</p>   |
| 59 |  | <p>Y. Hattori, et al.,<br/><i>Chem. Eur. J.</i>, 2019, <b>25</b>, 15463–15471.</p>   |

|    |                                                                                   |                                                                                       |
|----|-----------------------------------------------------------------------------------|---------------------------------------------------------------------------------------|
| 60 | 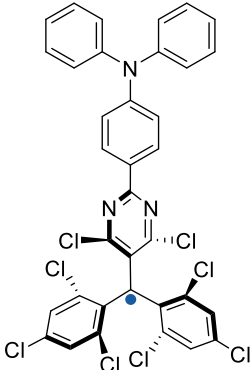 | <p>M. Zhang, et al.,<br/><i>J. Am. Chem. Soc.</i>, 2025, <b>147</b>, 45423–45431.</p> |
| 61 |  | <p>M. Zhang, et al.,<br/><i>J. Am. Chem. Soc.</i>, 2025, <b>147</b>, 45423–45431.</p> |

**Table 4** : Reported fused triarylmethyl radicals.

| Entry | Structure                                                                           | Reference                                                                               |
|-------|-------------------------------------------------------------------------------------|-----------------------------------------------------------------------------------------|
| 62    | 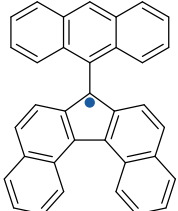 | <p>Y. Tian, et al.,<br/><i>J. Am. Chem. Soc.</i>, 2014, <b>136</b>, 12784–12793.</p>    |
| 63    |  | <p>Y. Tian, et al.,<br/><i>J. Am. Chem. Soc.</i>, 2014, <b>136</b>, 12784–12793.</p>    |
| 64    |  | <p>Y. Tian, et al.,<br/><i>J. Am. Chem. Soc.</i>, 2014, <b>136</b>, 12784–12793.</p>    |
| 65    |  | <p>W. Jiang, et al.,<br/><i>Angew. Chem. Int. Ed.</i>, 2025, <b>64</b>, e202418762.</p> |

|    |                                                                                     |                                                                                         |
|----|-------------------------------------------------------------------------------------|-----------------------------------------------------------------------------------------|
| 66 | 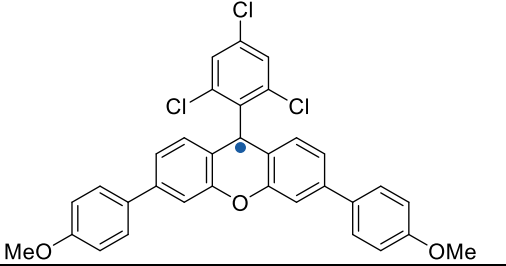   | <p>W. Jiang, et al.,<br/><i>Angew. Chem. Int. Ed.</i>, 2025, <b>64</b>, e202418762.</p> |
| 67 |    | <p>W. Jiang, et al.,<br/><i>Angew. Chem. Int. Ed.</i>, 2025, <b>64</b>, e202418762.</p> |
| 68 |    | <p>W. Jiang, et al.,<br/><i>Angew. Chem. Int. Ed.</i>, 2025, <b>64</b>, e202418762.</p> |
| 69 |   | <p>W. Jiang, et al.,<br/><i>Angew. Chem. Int. Ed.</i>, 2025, <b>64</b>, e202418762.</p> |
| 70 |  | <p>W. Jiang, et al.,<br/><i>Angew. Chem. Int. Ed.</i>, 2025, <b>64</b>, e202418762.</p> |
| 71 |  | <p>E. Müller, et al.,<br/><i>Tetrahedron Lett.</i>, 1967, <b>8</b>, 3877–3880.</p>      |
| 72 |  | <p>Y. Morita, et al.,<br/><i>Bull. Chem. Soc. Jpn.</i>, 2018, <b>91</b>, 922–931.</p>   |

|    |                                                                                     |                                                                                                                                                                   |
|----|-------------------------------------------------------------------------------------|-------------------------------------------------------------------------------------------------------------------------------------------------------------------|
| 73 | 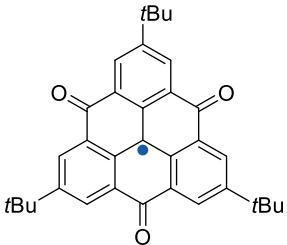   | <p>Y. Morita, et al.,<br/><i>Bull. Chem. Soc. Jpn.</i>, 2018, <b>91</b>, 922–931.</p> <p>Y. Morita, et al.,<br/><i>Nat. Mater.</i>, 2011, <b>10</b>, 947–951.</p> |
| 74 |    | <p>Y. Morita, et al.,<br/><i>Bull. Chem. Soc. Jpn.</i>, 2018, <b>91</b>, 922–931.</p> <p>Y. Morita, et al.,<br/><i>Nat. Mater.</i>, 2011, <b>10</b>, 947–951.</p> |
| 75 |    | <p>Y. Morita, et al.,<br/><i>Bull. Chem. Soc. Jpn.</i>, 2018, <b>91</b>, 922–931.</p>                                                                             |
| 76 |   | <p>Y. Morita, et al.,<br/><i>Bull. Chem. Soc. Jpn.</i>, 2018, <b>91</b>, 922–931.</p>                                                                             |
| 77 |  | <p>Y. Morita, et al.,<br/><i>Bull. Chem. Soc. Jpn.</i>, 2018, <b>91</b>, 922–931.</p>                                                                             |
| 78 |  | <p>A. Ueda, et al.,<br/><i>Chem. Eur. J.</i>, 2012, <b>18</b>, 16272–16276.</p>                                                                                   |
| 79 |  | <p>T. Kushida, et al.,<br/><i>J. Am. Chem. Soc.</i>, 2017, <b>139</b>, 14336–14339.</p>                                                                           |

|    |                                                                                     |                                                                                        |
|----|-------------------------------------------------------------------------------------|----------------------------------------------------------------------------------------|
| 80 | 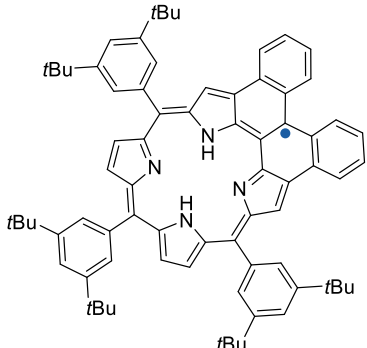   | <p>K. Kato, et al.,<br/> <i>Angew. Chem. Int. Ed.</i>, 2016, <b>55</b>, 8711–8714.</p> |
| 81 |    | <p>K. Kato, et al.,<br/> <i>Angew. Chem. Int. Ed.</i>, 2016, <b>55</b>, 8711–8714.</p> |
| 82 |   | <p>K. Kato, et al.,<br/> <i>Chem. Eur. J.</i>, 2018, <b>24</b>, 572–575.</p>           |
| 83 |  | <p>K. Kato, et al.,<br/> <i>Chem. Eur. J.</i>, 2018, <b>24</b>, 572–575.</p>           |
| 84 |  | <p>K. Kato, et al.,<br/> <i>Chem. Eur. J.</i>, 2018, <b>24</b>, 572–575.</p>           |

|    |                                                                                   |                                                                             |
|----|-----------------------------------------------------------------------------------|-----------------------------------------------------------------------------|
| 85 | 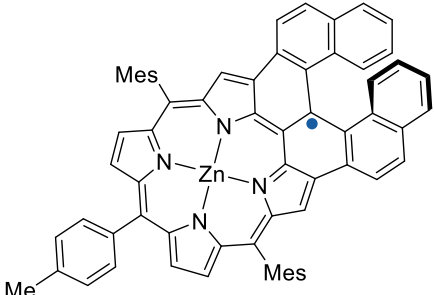 | <p>K. Kato, et al.,<br/><i>Chem. Eur. J.</i>, 2018, <b>24</b>, 572–575.</p> |
|----|-----------------------------------------------------------------------------------|-----------------------------------------------------------------------------|

**Table 5** : Reported dicyanoarylmethyl radicals.

| Entry | Structure                                                                           | Reference                                                                                |
|-------|-------------------------------------------------------------------------------------|------------------------------------------------------------------------------------------|
| 86    | 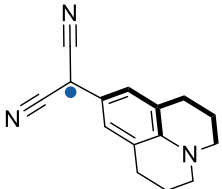   | <p>K. Okino, et al.,<br/><i>Angew. Chem. Int. Ed.</i>, 2017, <b>56</b>, 16597–16601.</p> |
| 87    |   | <p>K. Okino, et al.,<br/><i>Angew. Chem. Int. Ed.</i>, 2017, <b>56</b>, 16597–16601.</p> |
| 88    |  | <p>K. Okino, et al.,<br/><i>Angew. Chem. Int. Ed.</i>, 2017, <b>56</b>, 16597–16601.</p> |
| 89    |  | <p>B. Adinarayana, et al.,<br/><i>Chem. Eur. J.</i>, 2019, <b>25</b>, 1706–1710.</p>     |

|    |  |                                                                                |
|----|--|--------------------------------------------------------------------------------|
| 90 |  | B. Adinarayana, et al.,<br><i>Chem. Eur. J.</i> , 2019, <b>25</b> , 1706–1710. |
| 91 |  | B. Adinarayana, et al.,<br><i>Chem. Eur. J.</i> , 2019, <b>25</b> , 1706–1710. |

Table 6 : Previously published reviews related to stable/persistent radicals.

| Authors                                       | Title                                                                                                                                                     | Citation                                                  |
|-----------------------------------------------|-----------------------------------------------------------------------------------------------------------------------------------------------------------|-----------------------------------------------------------|
| S. Hünig                                      | Stable radical ions                                                                                                                                       | <i>Pure Appl. Chem.</i> , 1967, <b>15</b> , 109–122.      |
| E. R. Altwicker                               | The Chemistry of Stable Phenoxy Radicals                                                                                                                  | <i>Chem. Rev.</i> , 1967, <b>67</b> , 475–531.            |
| L. Salem and C. Rowland                       | The Electronic Properties of Diradicals                                                                                                                   | <i>Angew. Chem. Int. Ed.</i> , 1972, <b>11</b> , 92–111.  |
| F. A. Neugebauer,                             | Hydrazidinyl Radicals: 1,2,4,5-Tetraazapentenyls, Verdazyls, and Tetrazolinyls                                                                            | <i>Angew. Chem. Int. Ed.</i> , 1973, <b>12</b> , 455–464. |
| W. C. Danen and F. A. Neugebauer              | Aminyl Free Radicals                                                                                                                                      | <i>Angew. Chem. Int. Ed.</i> , 1975, <b>14</b> , 783–789. |
| W. T. Borden and E. R. Davidson               | Effects of electron repulsion in conjugated hydrocarbon diradicals                                                                                        | <i>J. Am. Chem. Soc.</i> , 1977, <b>99</b> , 4587–4594.   |
| A. A. Ovchinnikov                             | Multiplicity of the ground state of large alternant organic molecules with conjugated bonds                                                               | <i>Theoret. Chim. Acta</i> , 1978, <b>47</b> , 297–304.   |
| J. F. W. Keana                                | Newer aspects of the synthesis and chemistry of nitroxide spin labels                                                                                     | <i>Chem. Rev.</i> , 1978, <b>78</b> , 37–64.              |
| V. Bonačić-Koutecký, J. Koutecký and J. Michl | Neutral and Charged Biradicals, Zwitterions, Funnels in S <sub>1</sub> , and Proton Translocation: Their Role in Photochemistry, Photophysics, and Vision | <i>Angew. Chem. Int. Ed.</i> , 1987, <b>26</b> , 170–189. |
| D. A. Dougherty                               | Spin control in organic molecules                                                                                                                         | <i>Acc. Chem. Res.</i> , 1991, <b>24</b> , 88–94.         |
| A. Rajca                                      | Organic Diradicals and Polyradicals: From Spin Coupling to Magnetism?                                                                                     | <i>Chem. Rev.</i> , 1994, <b>94</b> , 871–893.            |
| E. Coronado and P. Day                        | Magnetic Molecular Conductors                                                                                                                             | <i>Chem. Rev.</i> , 2004, <b>104</b> , 5419–5448.         |
| D. Jérôme                                     | Organic Conductors: From Charge Density Wave TTF–TCNQ to Superconducting (TMTSF) <sub>2</sub> PF <sub>6</sub>                                             | <i>Chem. Rev.</i> , 2004, <b>104</b> , 5565–5592.         |
| B. D. Koivisto and R. G. Hicks                | The magnetochemistry of verdazyl radical-based materials                                                                                                  | <i>Coord. Chem. Rev.</i> , 2005, <b>249</b> , 2612–2630   |
| N. M. Shishlov                                | From the Gomberg radical to organic magnets                                                                                                               | <i>Russ. Chem. Rev.</i> , 2006, <b>75</b> , 863–884.      |
| J. M. Rawson, A. Alberola and A. Whalley      | Thiazyl radicals: old materials for new molecular devices                                                                                                 | <i>J. Mater. Chem.</i> , 2006, <b>16</b> , 2560–2575      |
| R. G. Hicks                                   | What's new in stable radical chemistry?                                                                                                                   | <i>Org. Biomol. Chem.</i> , 2007, <b>5</b> , 1321.        |

|                                                                         |                                                                                                              |                                                                                                      |
|-------------------------------------------------------------------------|--------------------------------------------------------------------------------------------------------------|------------------------------------------------------------------------------------------------------|
| L. Tebben and A. Studer                                                 | Nitroxides: Applications in Synthesis and in Polymer Chemistry                                               | <i>Angew. Chem. Int. Ed.</i> , 2011, <b>50</b> , 5034–5068.                                          |
| K. Nakahara, K. Oyaizu and H. Nishide                                   | Organic Radical Battery Approaching Practical Use                                                            | <i>Chem. Lett.</i> , 2011, <b>40</b> , 222–227.                                                      |
| E. D. Commins                                                           | Electron Spin and Its History                                                                                | <i>Annu. Rev. Nucl. Part. Sci.</i> , 2012, <b>62</b> , 133–157.                                      |
| A. Heckmann and C. Lambert                                              | Organic Mixed-Valence Compounds: A Playground for Electrons and Holes                                        | <i>Angew. Chem. Int. Ed.</i> , 2012, <b>51</b> , 326–392.                                            |
| T. Janoschka, M. D. Hager and U. S. Schubert                            | Powering up the Future: Radical Polymers for Battery Applications                                            | <i>Adv. Mater.</i> , 2012, <b>24</b> , 6397–6409.                                                    |
| M. Abe                                                                  | Diradicals                                                                                                   | <i>Chem. Rev.</i> , 2013, <b>113</b> , 7011–7088                                                     |
| K. E. Preuss                                                            | Metal-radical coordination complexes of thiazyl and selenazyl ligands                                        | <i>Coord. Chem. Rev.</i> , 2015, <b>289–290</b> , 49–61                                              |
| Z. Zeng, X. Shi, C. Chi, J. T. L. Navarrete, J. Casado and J. Wu        | Pro-aromatic and anti-aromatic $\pi$ -conjugated molecules: an irresistible wish to be diradicals            | <i>Chem. Soc. Rev.</i> , 2015, <b>44</b> , 6578–6596.                                                |
| O. Krumkacheva and E. Bagryanskaya,                                     | Triptyl radicals as spin labels                                                                              | in <i>Electron Paramagnetic Resonance</i> , The Royal Society of Chemistry, 2016, <b>25</b> , 35–60. |
| Y. Li, L. Li, Y. Wu and Y. Li                                           | A Review on the Origin of Synthetic Metal Radical: Singlet Open-Shell Radical Ground State?                  | <i>J. Phys. Chem. C.</i> , 2017, <b>121</b> , 8579–8588.                                             |
| M. Nakano                                                               | Electronic Structure of Open-Shell Singlet Molecules: Diradical Character Viewpoint                          | <i>Top. Curr. Chem. (Z)</i> , 2017, <b>375</b> , 47.                                                 |
| M. M. Haugland, J. E. Lovett and E. A. Anderson                         | Advances in the synthesis of nitroxide radicals for use in biomolecule spin labelling                        | <i>Chem. Soc. Rev.</i> , 2018, <b>47</b> , 668–680.                                                  |
| J. Casado                                                               | Para-quinodimethanes: a unified review of the quinoidal-versus-aromatic competition and its implications,    | <i>Top. Curr. Chem.</i> , 2018, 209–248.                                                             |
| D. Shimizu and A. Osuka                                                 | Porphyrinoids as a platform of stable radicals                                                               | <i>Chem. Sci.</i> , 2018, <b>9</b> , 1408–1423.                                                      |
| M. M. Roessler and E. Salvadori                                         | Principles and applications of EPR spectroscopy in the chemical sciences                                     | <i>Chem. Soc. Rev.</i> , 2018, <b>47</b> , 2534–2553.                                                |
| T. Stuyver, B. Chen, T. Zeng, P. Geerlings, F. De Proft and R. Hoffmann | Do Diradicals Behave Like Radicals?                                                                          | <i>Chem. Rev.</i> , 2019, <b>119</b> , 11291–11351.                                                  |
| M. Kertesz                                                              | Pancake Bonding: An Unusual Pi-Stacking Interaction                                                          | <i>Chem. Eur. J.</i> , 2019, <b>25</b> , 400–416.                                                    |
| G. N. Lipunova, T. G. Fedorchenko, A. N. Tsmokalyuk and O. N. Chupakhin | Advances in verdazyl chemistry                                                                               | <i>Russ. Chem. Bull.</i> , 2020, <b>69</b> , 1203–1222                                               |
| D. Luneau                                                               | Coordination Chemistry of Nitronyl Nitroxide Radicals Has Memory                                             | <i>Eur. J. Inorg. Chem.</i> , 2020, <b>2020</b> , 597–604.                                           |
| Y. Teki                                                                 | Excited-State Dynamics of Non-Luminescent and Luminescent $\pi$ -Radicals                                    | <i>Chem. Eur. J.</i> , 2020, <b>26</b> , 980–996.                                                    |
| Y. Ji, L. Long and Y. Zheng                                             | Recent advances of stable Blatter radicals: synthesis, properties and applications                           | <i>Mater. Chem. Front.</i> , 2020, <b>4</b> , 3433–3443.                                             |
| D. Yuan, W. Liu and X. Zhu                                              | Design and Applications of Single-Component Radical Conductors                                               | <i>Chem</i> , 2021, <b>7</b> , 333–357.                                                              |
| M. G. F. Vaz and M. Andruh                                              | Molecule-based magnetic materials constructed from paramagnetic organic ligands and two different metal ions | <i>Coord. Chem. Rev.</i> , 2021, <b>427</b> , 213611.                                                |
| Z. X. Chen, Y. Li and F. Huang                                          | Persistent and Stable Organic Radicals: Design, Synthesis, and Applications                                  | <i>Chem</i> , 2021, <b>7</b> , 288–332.                                                              |
| R. Murata, Z. Wang and M. Abe                                           | Singly Occupied Molecular Orbital-Highest Occupied Molecular Orbital (SOMO-HOMO) Conversion                  | <i>Aust. J. Chem.</i> , 2021, <b>74</b> , 827–837.                                                   |

|                                                                           |                                                                                                                                                                              |                                                              |
|---------------------------------------------------------------------------|------------------------------------------------------------------------------------------------------------------------------------------------------------------------------|--------------------------------------------------------------|
| L. Mao, M. Zhou, X. Shi and H.-B. Yang                                    | Triphenylamine (TPA) radical cations and related macrocycles                                                                                                                 | <i>Chin. Chem. Lett.</i> , 2021, <b>32</b> , 3331–3341       |
| P. Murto and H. Bronstein                                                 | Electro-optical $\pi$ -radicals: design advances, applications and future perspectives                                                                                       | <i>J. Mater. Chem. C</i> , 2022, <b>10</b> , 7368–7403.      |
| Y. Tan, S.-N. Hsu, H. Tahir, L. Dou, B. M. Savoie and B. W. Boudouris     | Electronic and Spintronic Open-Shell Macromolecules, Quo Vadis?                                                                                                              | <i>J. Am. Chem. Soc.</i> , 2022, <b>144</b> , 626–647.       |
| S. Kasemthaveechok, L. Abella, J. Crassous, J. Autschbach and L. Favereau | Organic radicals with inversion of SOMO and HOMO energies and potential applications in optoelectronics                                                                      | <i>Chem. Sci.</i> , 2022, <b>13</b> , 9833–9847.             |
| J. Ahmed and S. K. Mandal                                                 | Phenalenyl Radical: Smallest Polycyclic Odd Alternant Hydrocarbon Present in the Graphene Sheet                                                                              | <i>Chem. Rev.</i> , 2022, <b>122</b> , 11369–11431.          |
| C. Shu, Z. Yang and A. Rajca                                              | From Stable Radicals to Thermally Robust High-Spin Diradicals and Triradicals                                                                                                | <i>Chem. Rev.</i> , 2023, <b>123</b> , 11954–12003.          |
| A. Hinz, J. Bresien, F. Breher and A. Schulz                              | Heteroatom-Based Diradical(oid)s                                                                                                                                             | <i>Chem. Rev.</i> , 2023, <b>123</b> , 10468–10526.          |
| S. Gao and F. Li                                                          | Neutral Stable Nitrogen-Centered Radicals: Structure, Properties, and Recent Functional Application Progress                                                                 | <i>Adv. Funct. Mater.</i> , 2023, <b>33</b> , 2304291.       |
| D. Leifert and A. Studer                                                  | Organic Synthesis Using Nitroxides                                                                                                                                           | <i>Chem. Rev.</i> , 2023, <b>123</b> , 10302–10380.          |
| T. Quintes, M. Mayländer and S. Richert                                   | Properties and applications of photoexcited chromophore–radical systems                                                                                                      | <i>Nat. Rev. Chem.</i> , 2023, <b>7</b> , 75–90.             |
| K. Hatakeyama-Sato and K. Oyaizu                                          | Redox: Organic Robust Radicals and Their Polymers for Energy Conversion/Storage Devices                                                                                      | <i>Chem. Rev.</i> , 2023, <b>123</b> , 11336–11391.          |
| T. Quintes, M. Franz, P. Thielert, A. J. Redman and S. Richert            | Determination of exchange coupling constants in the electronic ground and excited states of molecular multi-spin systems                                                     | <i>Chem. Phys. Rev.</i> , 2024, <b>5</b> , 041312.           |
| A. Mizuno, R. Matsuoka, T. Mibu and T. Kusamoto                           | Luminescent Radicals                                                                                                                                                         | <i>Chem. Rev.</i> , 2024, <b>124</b> , 1034–1121.            |
| X. Zhang, X. Chen, Y. Sun and J. Zhao                                     | Radical enhanced intersystem crossing mechanism, electron spin dynamics of high spin states and their applications in the design of heavy atom-free triplet photosensitizers | <i>Org. Biomol. Chem.</i> , 2024, <b>22</b> , 5257–5283.     |
| A. Zhou, Z. Sun and L. Sun                                                | Stable organic radical qubits and their applications in quantum information science                                                                                          | <i>Innovation</i> , 2024, <b>5</b> , 100662                  |
| Y. Zhu, Z. Zhu, S. Wang, Z. Kuang, Q. Peng and A. Abdurahman              | Anti-Kasha Emission in Organic Radicals: Mechanistic Insights and Experimental Caveats                                                                                       | <i>ChemPhotoChem</i> , 2025, <b>9</b> , e202500118.          |
| Z. Zhang, J. Zhang, J. Zhi Sun, H. Zhang, X. Zhang and B. Zhong Tang      | Luminescent Radical Polymers                                                                                                                                                 | <i>Chem. Eur. J.</i> , 2025, <b>31</b> , e202403493.         |
| G. N. Lipunova, T. G. Fedorchenko, A. V. Shchepochkin and O. N. Chupakhin | New aspects of verdazyl chemistry                                                                                                                                            | <i>Russ. Chem. Bull.</i> , 2025, <b>74</b> , 328–353.        |
| D. Straub, M. Gross, M. E. Arnold, J. Zolg and A. J. C. Kuehne            | On the photoluminescence in triarylmethyl-centered mono-, di-, and multiradicals                                                                                             | <i>Beilstein J. Org. Chem.</i> , 2025, <b>21</b> , 964–998.  |
| K. Dzieszkowski and M. Pawlicki                                           | Open-Shell States in Dynamic Diradicaloids                                                                                                                                   | <i>ChemPlusChem</i> , 2025, <b>90</b> , e202500033.          |
| C. A. Ndamyabera and H. W. Langmi                                         | Recent Developments in Organic Radical Inclusion in MOFs and Radical MOFs                                                                                                    | <i>ChemistryOpen</i> , 2025, <b>14</b> , e202500069.         |
| Y. Zhu, Z. Zhu, S. Wang, Q. Peng and A. Abdurahman                        | Stable Luminescent Diradicals: The Emergence and Potential Applications                                                                                                      | <i>Angew. Chem. Int. Ed.</i> , 2025, <b>64</b> , e202423470. |
| W. Wu                                                                     | Stable organic radicals – a material platform for developing molecular quantum technologies                                                                                  | <i>Phys. Chem. Chem. Phys.</i> , 2025, <b>27</b> , 1214–1221 |
